# Supplementary material
Source: Springer Nature journal article supplement (https://www.springermedizin.de/resource/supplementary/13075_2011_3074_MOESM1_ESM.pdf/9693658)

Genes up-regulated by rhOP-1

A

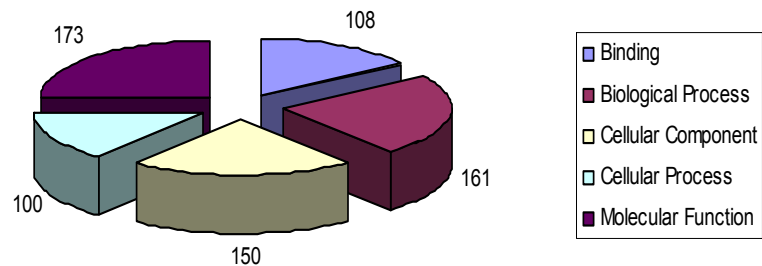

Genes down-regulated by rhOP-1

B

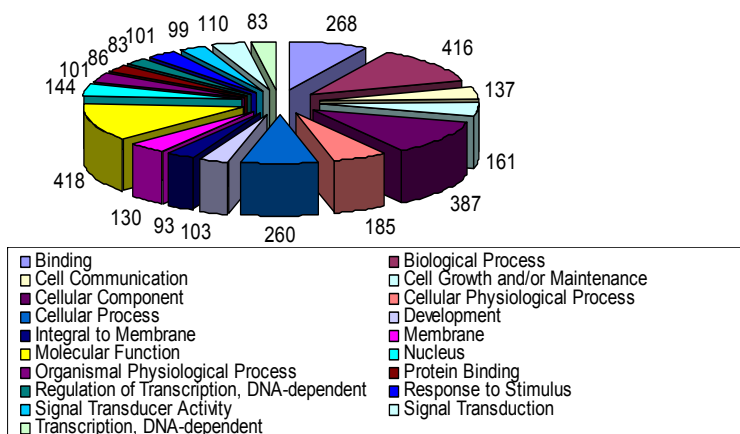

Genes up-regulated by OP-1AS

C

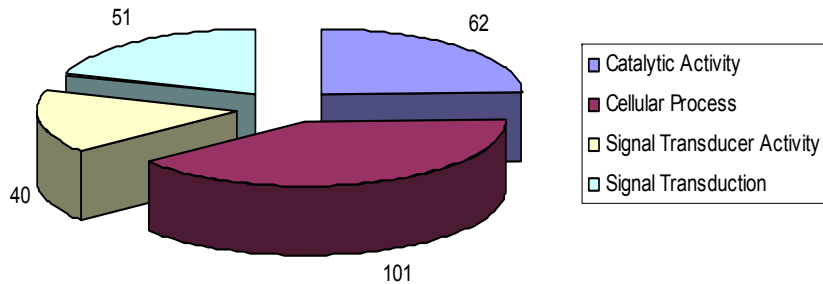

Genes down-regulated by OP-1AS

D

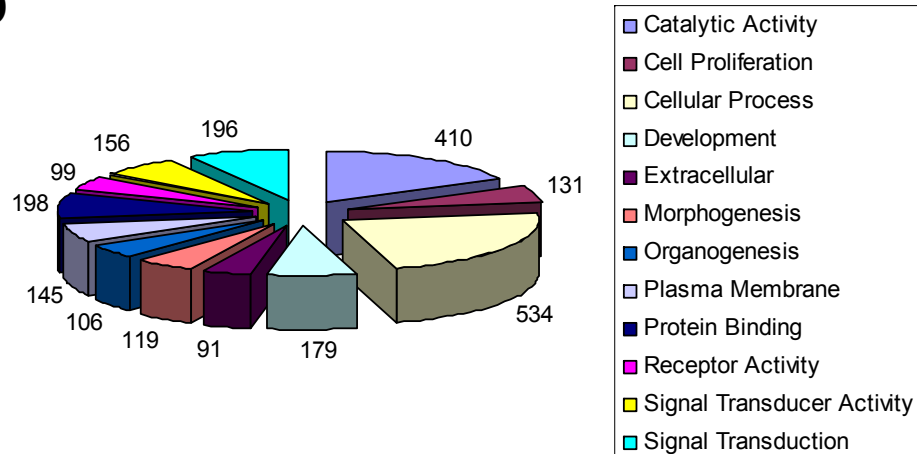

Supplement: MOESM1 [file 9693658]
